# Supplementary material
Source: MDPI journal article supplement (https://www.mdpi.com/2311-5637/8/2/62)
Supplement: s1 [file s1]

**Supplementary Table S1.** Sequences of primers used to quantitate copy numbers of chromosomes by qRT-PCR.

| Chr. | Sequence              |                       |
|------|-----------------------|-----------------------|
|      | Forward primer        | Reverse primer        |
| 1    | CAGTGTGAAAGAGAGGGCTAT | CAGGGGCAAAGTGAAGATT   |
| 2    | ATAAATGTGTCCGGATCGC   | TATTTTATGGTTTCCCATTCC |
| 3    | GGCAAAACTTTACGGTCCAG  | TTAGCGGTATGCGTTTTCCA  |
| 4    | CTGTTCGTGGCGAAAATTTG  | CACACAAATCAAAAGTCTGGG |
| 5    | GACTGCCATGTCAGGAGGATT | CCGATCGTTTCCTGCGATTTA |
| 6    | AAGTGGCAGGAATTTTGCGA  | TAGCTGGTGGTTATTGGCAGG |
| 7    | GGTTTGGCTCCAAATTTGCT  | GGTAAACACGATATTGGTGA  |
| 8    | TGGTTCATCCATGATTGGTG  | AGCCACAGTCAATTCGAAGA  |
| 9    | TGTCATCGTCATCATCGTCCA | GGCTTCCAGTTATGTCTTCGC |
| 10   | AATGACCCTCAGGAGTTTGA  | CCATACAATGTACCATGCGA  |
| 11   | GATGCGAGGGATCAGAAGAT  | GCGGCTCGAAAGAAAATTC   |
| 12   | CCCTTCATTGCAAAATGCA   | TCCAGGATCAGTTGTGGAAA  |
| 13   | ACAACACGATGAATGGCTTT  | CCGCTTAAATAATCCTGGAAG |
| 14   | AGATTCGTTAGATCTGCTGGG | TCAGCATTAGGATCGGTTGA  |
| 15   | CGGTGGAGTATCTCACACGTT | TGGTAAAGCTTGGGTTCATCA |
| 16   | TAACGGCCACGACGATGAAA  | TCGAAGGAGTTCAATGCAAGA |

**Supplementary Table S2.** Conditions of GC-flame ionization detector (GC-FID)

analysis.

|                                       | Endogenous<br>metabolites                        | Hydrophilic<br>metabolites of<br>the brewed<br>broth | Volatile components<br>of the brewed broth                              |
|---------------------------------------|--------------------------------------------------|------------------------------------------------------|-------------------------------------------------------------------------|
| Column                                | CP SIL 8 CB <sup>α</sup>                         | CP SIL 8CB <sup>α</sup>                              | DB-WAX column <sup>β</sup>                                              |
| Carrier gas (N <sub>2</sub> , mL/min) | 0.84                                             | 0.84                                                 | 1.07                                                                    |
| Split ratio (v/v)                     | 2 : 1                                            | 5 : 1                                                | 3.8 : 1                                                                 |
| Oven temperature                      | 80°C (2min) →<br>→15°C/min →<br>320°C<br>(22min) | 80°C (2min) →<br>15°C/min →<br>320°C<br>(22min)      | 40°C (1min) →<br>5°C/min (12min) →<br>20°C/min (5min) →<br>200°C (4min) |
| Injection temperature                 | 230 °C                                           | 230 °C                                               | 200 °C                                                                  |
| Detector temperature                  | 320 °C                                           | 320 °C                                               | 320 °C                                                                  |

<sup>α</sup> 30 m × 0.25 mm, 0.25 μm film thickness (Agilent Technologies, Santa Clara, CA, USA).

<sup>β</sup> 30 m × 0.25 mm, 0.25 μm film thickness (J&W Scientific, Folsom, CA, USA).

**Supplementary Table S3.** List of identified peaks in the GC-flame ionization detector

(GC-FID) analysis.

| Endogenous metabolites |             | Hydrophilic component<br>of<br>the brewed broth |             | Aroma component of<br>the brewed broth |                 |
|------------------------|-------------|-------------------------------------------------|-------------|----------------------------------------|-----------------|
| Peak name              | RT<br>(min) | Peak name                                       | RT<br>(min) | Peak name                              | RT<br>(min<br>) |
| pyruvate-1TMS          | 6.750       | pyruvate-1TMS                                   | 6.750       | acetone (IS)                           | 3.50            |
| valine-1TMS            | 7.100       | valine-1TMS                                     | 7.030       | ethanol                                | 4.80            |
| alanine-1TMS           | 7.280       | alanine-1TMS                                    | 7.210       | 1-propanol                             | 6.60            |
| leucine-1TMS           | 7.837       | proline,                                        | 8.107       | 2-metyl-1-                             | 7.80            |
| isoleucine-1TMS        | 8.050       | valine-2TMS                                     | 8.420       | 3-methyl-1-                            | 11.0            |
| valine-2TMS            | 8.498       | serine-1TMS                                     | 8.824       | ethyl octanoate                        | 15.8            |
| serine-1TMS            | 8.924       | glycerol-1TMS                                   | 9.048       | ethyl decanoate                        | 17.5            |
| leucine-2TMS, urea,    | 9.028       | isoleucine-                                     | 9.215       | unknown01                              | 13.2            |
| isoleucine-2TMS        | 9.230       | threonine-1TMS                                  | 9.267       | unknown02                              | 17.1            |
| threonine-1TMS         | 9.287       | succinate-1TMS                                  | 9.320       | unknown03                              | 21.0            |
| succinate, glycine-    | 9.405       | glycine-1TMS                                    | 9.360       |                                        |                 |
| fumarate-1TMS          | 9.680       | fumarate-1TMS                                   | 9.680       |                                        |                 |
| serine-2TMS            | 9.914       | serine-2TMS                                     | 9.810       |                                        |                 |
| threonine-2TMS         | 10.17       | threonine-2TMS                                  | 10.00       |                                        |                 |
| aspartate-1TMS         | 10.46       | aspartate-1TMS                                  | 10.41       |                                        |                 |
| malate-1TMS            | 11.04       | malate-1TMS                                     | 11.01       |                                        |                 |
| aspartate-2TMS,        | 11.32       | aspartate-2TMS                                  | 11.32       |                                        |                 |
| glutamate-2TMS         | 12.14       | glutamate-                                      | 11.37       |                                        |                 |
| ribitol (IS) -1TMS     | 13.07       | glutamate-                                      | 11.95       |                                        |                 |
| citrate-1TMS           | 13.66       | ribitol (IS) -                                  | 12.98       |                                        |                 |
| lysine-1TMS            | 13.95       | citrate-1TMS                                    | 13.71       |                                        |                 |
| glucose-1TMS           | 14.43       | lysine-1TMS                                     | 13.95       |                                        |                 |
| lysine-2TMS            | 14.49       | lysine-2TMS                                     | 14.49       |                                        |                 |
| glucose-2TMS           | 14.63       | glucose-2TMS                                    | 14.54       |                                        |                 |
| unknown01              | 13.80       | unknown01                                       | 7.750       |                                        |                 |
| unknown02              | 19.80       | unknown02                                       | 11.40       |                                        |                 |
| unknown03              | 21.40       | unknown03                                       | 14.61       |                                        |                 |
| unknown04              | 13.57       |                                                 |             |                                        |                 |
| unknown05              | 8.210       |                                                 |             |                                        |                 |
| unknown06              | 7.357       |                                                 |             |                                        |                 |

unknown07

11.72

---
